# Supplementary material for: Evaluation of five regions as DNA barcodes for identification of Lepista species (Tricholomataceae, Basidiomycota) from China
Source: PeerJ journal article supplement (doi:10.7717/peerj.7307), 2019-07-15

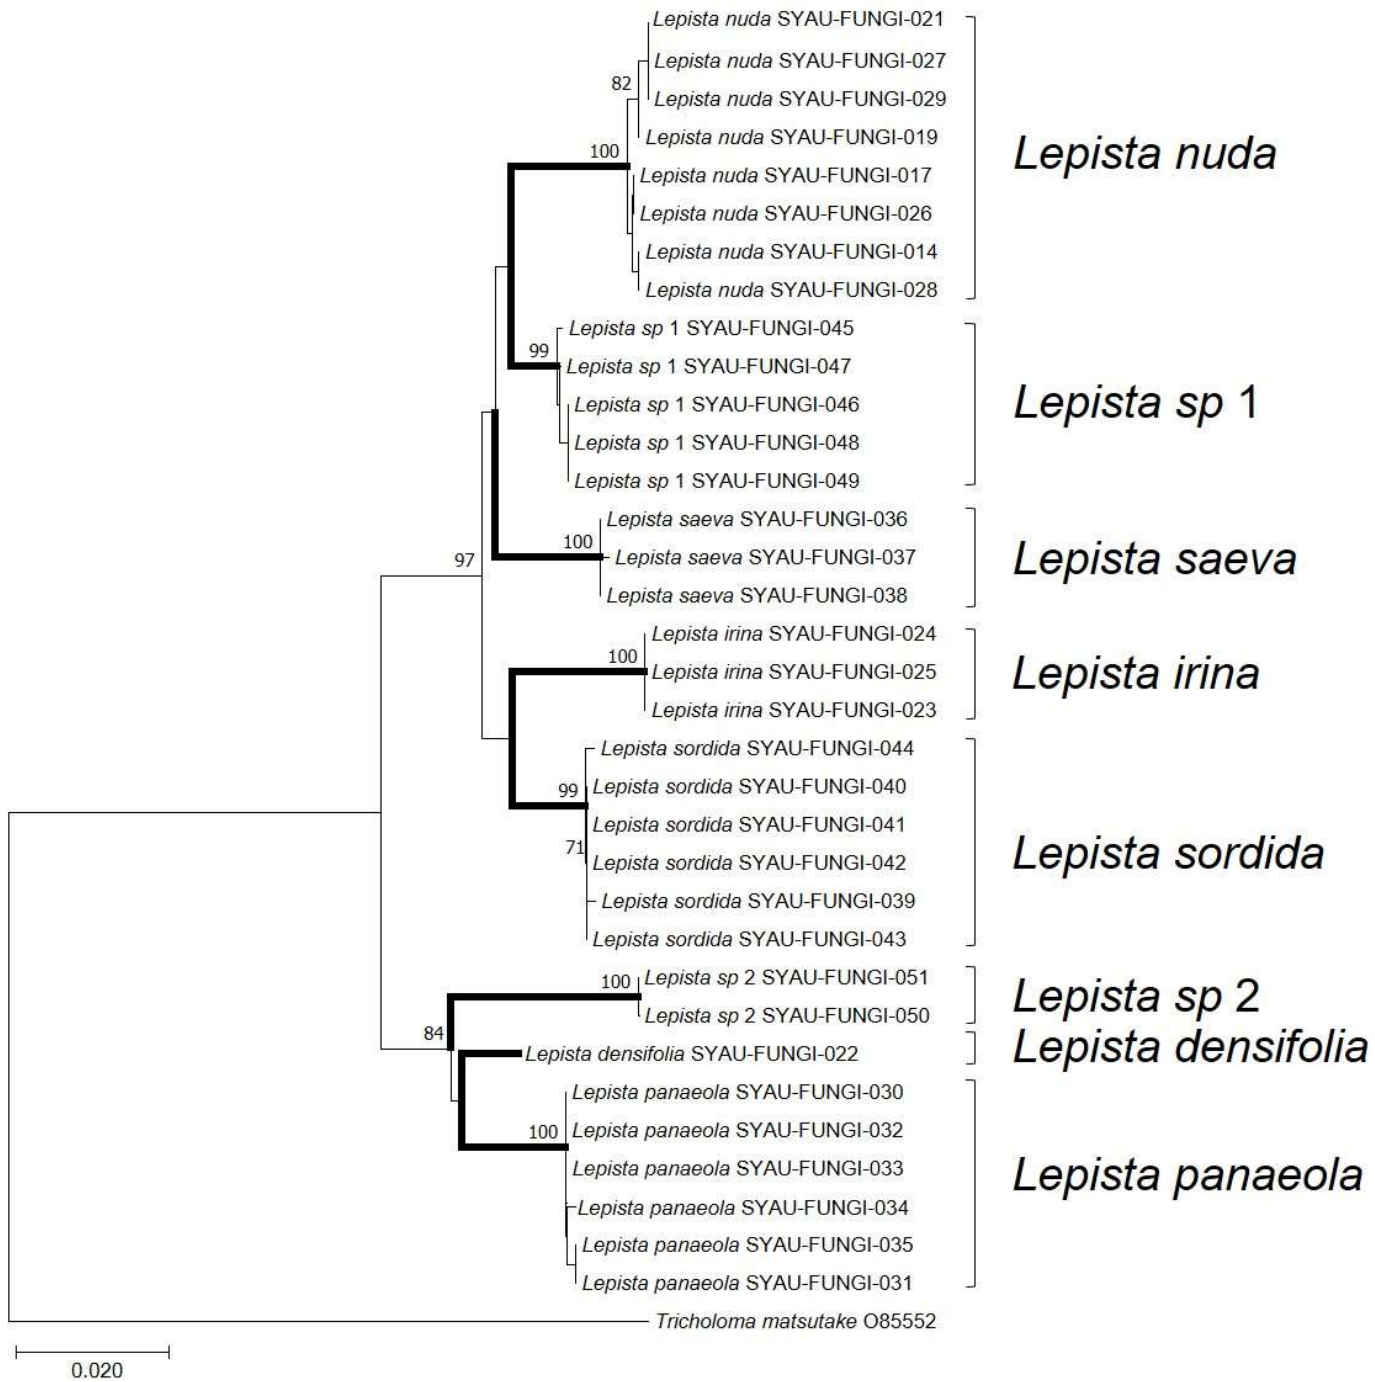

Supplement: Figure_S1.pdf [file Figure_S1.pdf]
